# Supplementary material for: HSV1716 Prevents Myeloma Cell Regrowth When Combined with Bortezomib In Vitro and Significantly Reduces Systemic Tumor Growth in Mouse Models
Source: MDPI journal article supplement (doi:10.3390/v15030603), 2023-02-22
Supplement: s1 [file s1]

## Supplementary Materials

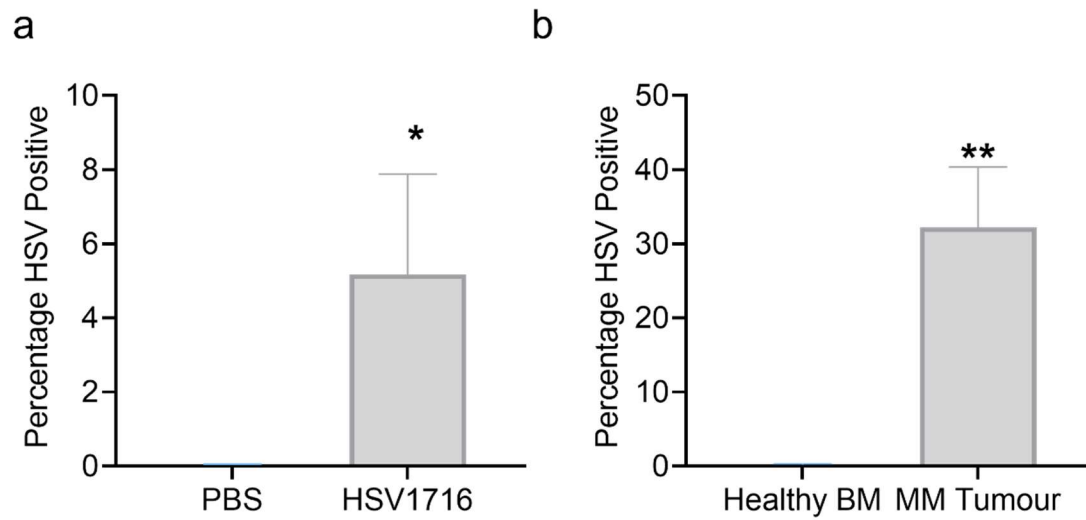

**Figure S1. HSV1716 particles found only in Tumour areas of HSV1716 treated xenograft mice.** At sacrifice tibial bones were fixed and decalcified before paraffin sections were stained for HSV viral particles. **(a)** Percentage of HSV1716 staining in PBS and HSV1716 treated mice. Data are mean  $\pm$  SEM,  $n=5$  mice per group. \* =  $p < 0.05$  unpaired T-test, w.r.t control. **(b)** Percentage of HSV1716 particles within JJN-3 tumour areas and healthy bone marrow areas within HSV1716 treated mice. Data are mean  $\pm$  SEM, \*\* =  $p < 0.01$  unpaired T-test, w.r.t control.

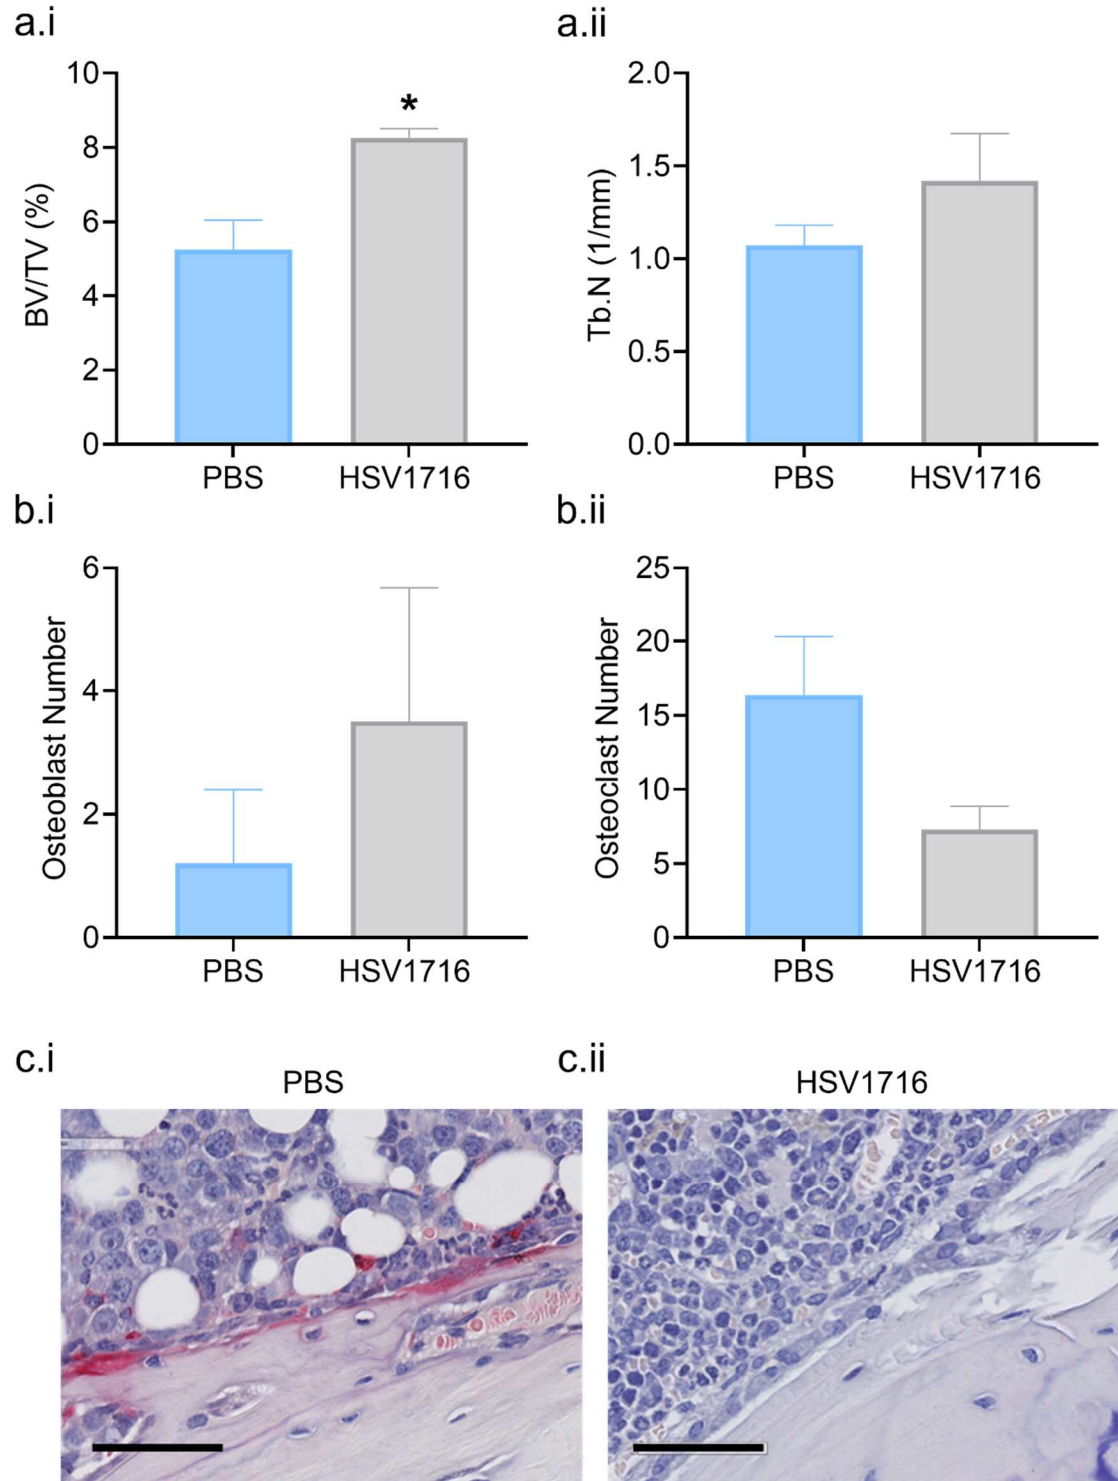

**Figure S2. HSV1716 treated xenograft mice had increased trabecular volume.** At sacrifice tibial bones were fixed and scanned by micro-CT to assess myeloma-induced bone disease. **(a.i)** Trabecular volume as assessed as a percentage of bone volume/trabecular volume in PBS or HSV1716 treated mice. **(a.ii)** Trabecular number in PBS or HSV1716 treated mice. Data are mean  $\pm$  SEM,  $n=5$  mice per group. \* =  $p < 0.05$  unpaired T-test, w.r.t control. Following micro-CT, bones were decalcified and paraffin embedded. Bone histomorphometry was performed in TRAP stained sections. **(b.i)** Osteoblast number in PBS or HSV treated mice, **(b.ii)** osteoclast number in PBS pr HSV treated mice. Data are mean  $\pm$  SEM,  $n=5$  mice per group. \* =  $p < 0.05$  unpaired T-test, w.r.t control. Representative images of TRAP positive osteoclasts (stained red) on the cortico-endosteal surface of tibiae from **(c.i)** PBS treated mice and **(c.ii)** HSV1716 treated mice, Bar = 100  $\mu$ m.

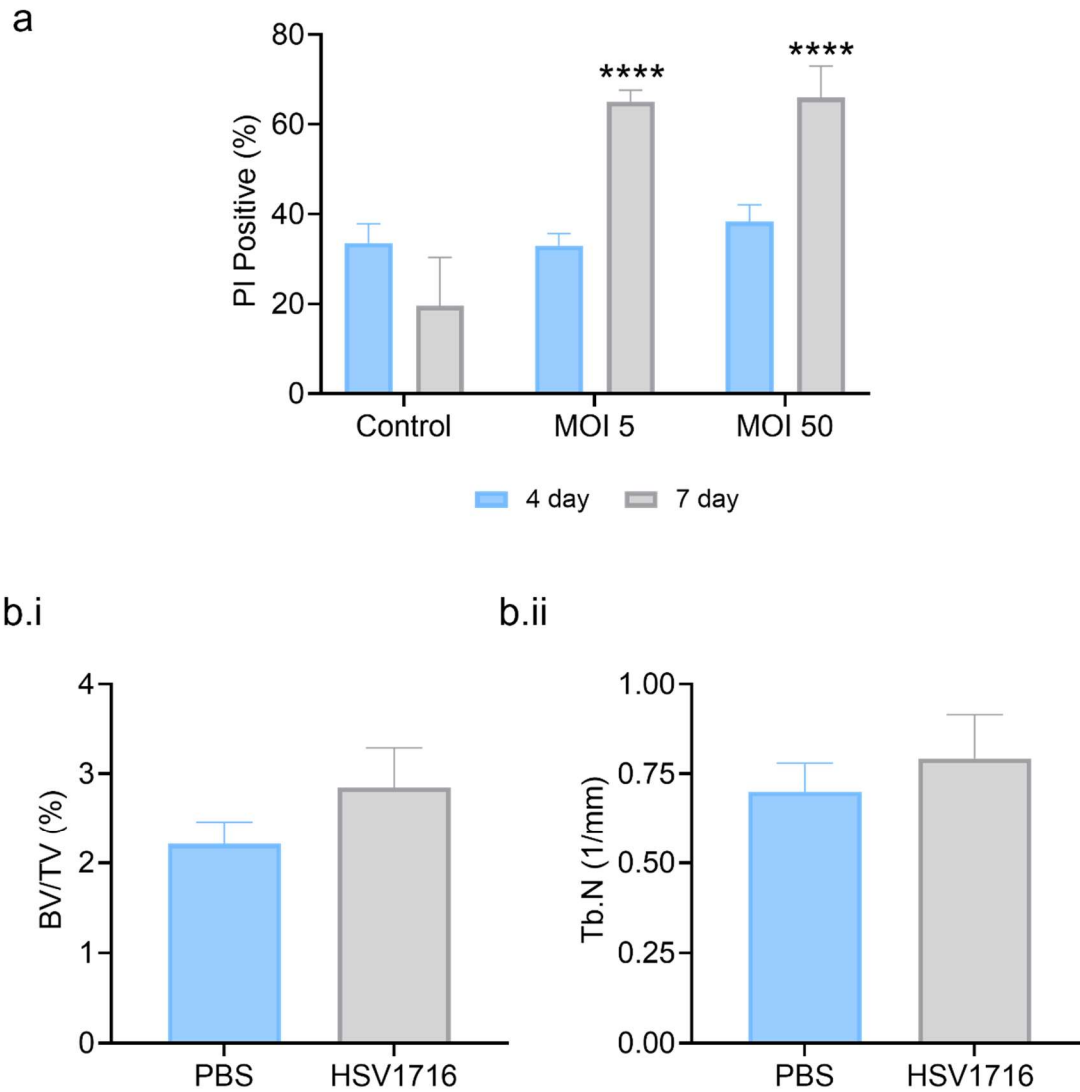

**Figure S3.** HSV1716 induces delayed cell death *in vitro* in 5TGM1 cells and does not significantly alter trabecular bone volume in 5TGM1 syngeneic *in vivo* model. (a) 5TGM1 cells were treated with HSV1716 at MOI 5 or 50. After 4 and 7 days, cell death was assessed by PI staining and flow cytometry. Data are mean  $\pm$  SEM,  $n=3$ . \* =  $p < 0.05$  2way ANOVA. At sacrifice tibial bones were fixed and scanned by micro-CT to assess myeloma-induced bone disease. (a.i) Trabecular volume as assessed as a percentage of bone volume/trabecular volume in PBS or HSV1716 treated mice. (a.ii) Trabecular number in PBS or HSV1716 treated mice. Data are mean  $\pm$  SEM,  $n=5$  mice per group. \*\*\*\* =  $p < 0.0001$  unpaired T-test, w.r.t control.

**Table S1.** SYBR Green Primer Sequences.

| Gene  | Forward                         | Reverse                        |
|-------|---------------------------------|--------------------------------|
| ICP0  | 5' AAGCTTGGATCCGAGCCCGCCC       | 5' AAGCGGTGCATGCACGGAAGGT      |
| ICP8  | 5' GACATTACGTTACGGCCTTCGAAGCCAG | 5' GGCCGAGTTGGTGCTAAATACCATGGC |
| GAPDH | 5' TGCACCACTCACTGCTTAGC         | 5' GGCATGGAC TGTGGTCATGAG      |
